# Supplementary material for: Structure-engineering of core–shell ZnCo2O4@NiO composites for high-performance asymmetric supercapacitors
Source: Royal Society of Chemistry journal article supplement (doi:10.1039/d1na00851j), 2021-12-24
Supplement: d1na00851j1.pdf [file d1na00851j1.pdf]

## Structure-engineering of core-shell $\text{ZnCo}_2\text{O}_4@\text{NiO}$ composites for high-performance asymmetric supercapacitors

Gokul P. Kamble<sup>a</sup>, Akash S. Rasal<sup>a,b</sup>, Jia-Yaw Chang<sup>b</sup>, Sanjay S. Kolekar<sup>c</sup>, Shivaji N. Tayade<sup>d</sup>, and Anil V. Ghule<sup>a\*</sup>

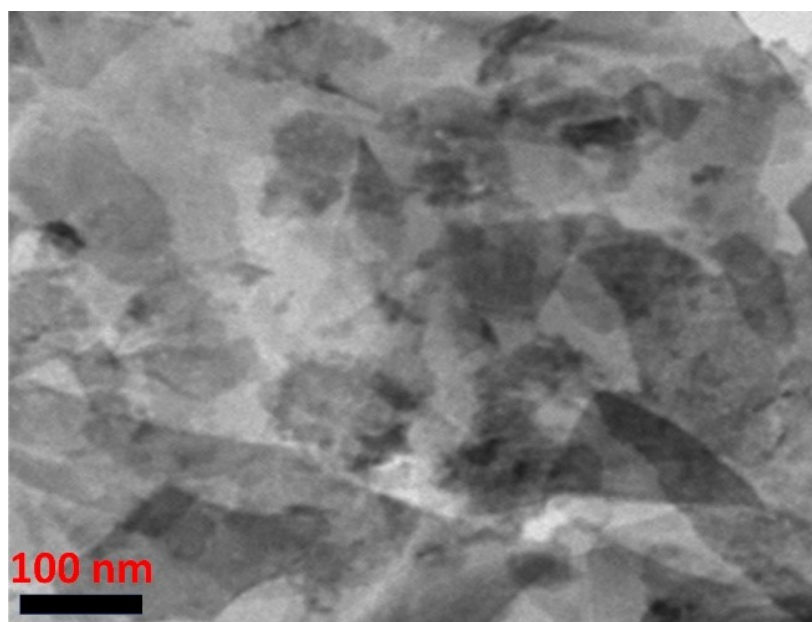

### Supporting Information

Fig. S1- Representative TEM image of NZ-1.

Fig. S2- Representative XPS survey spectrum of NZ-1.

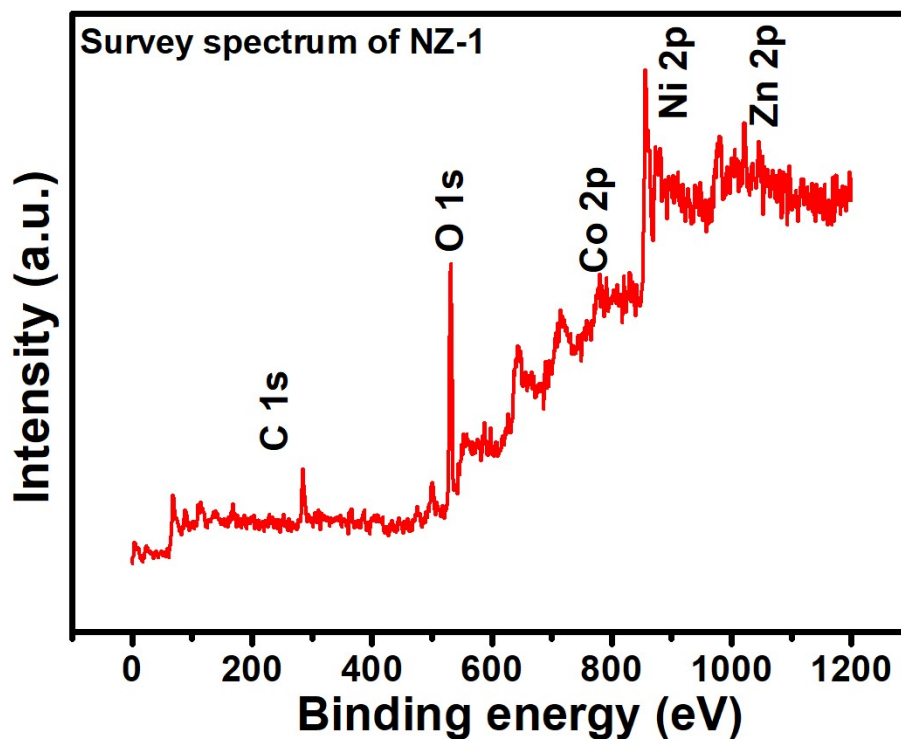

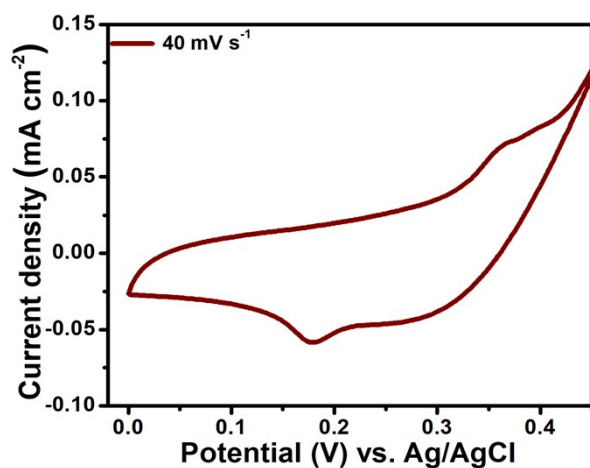

Fig. S3- CV curve of  $\text{ZnCo}_2\text{O}_4$  at  $40 \text{ mV s}^{-1}$ .

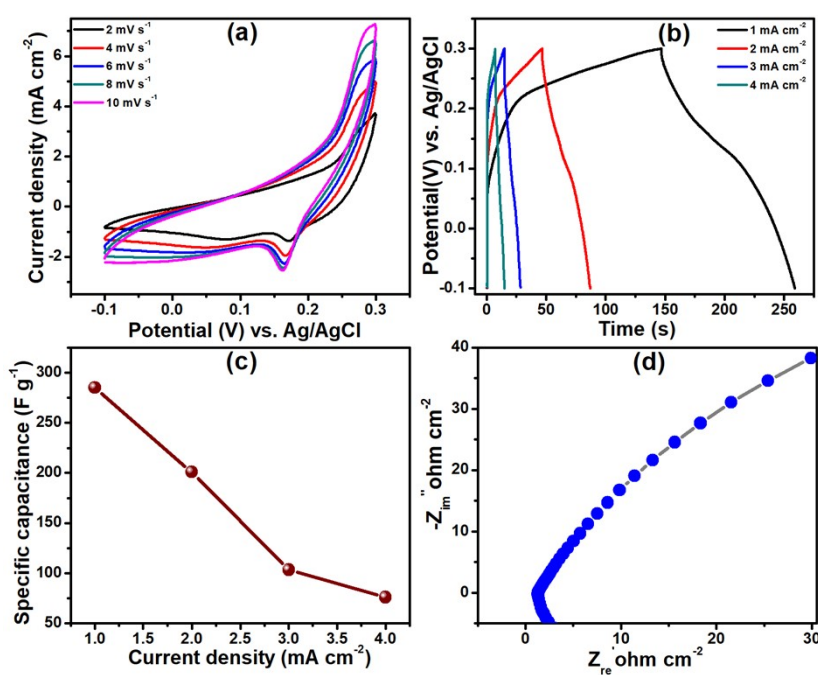

Fig. S4- Representative (a) CV curves (b) GCD curves (c) Graph of specific capacitance measured at different current densities (d) Nyquist plot of NiO

Fig. S5 Cycling stability curve of NZ-1 at a current density of  $10 \text{ mA cm}^{-2}$

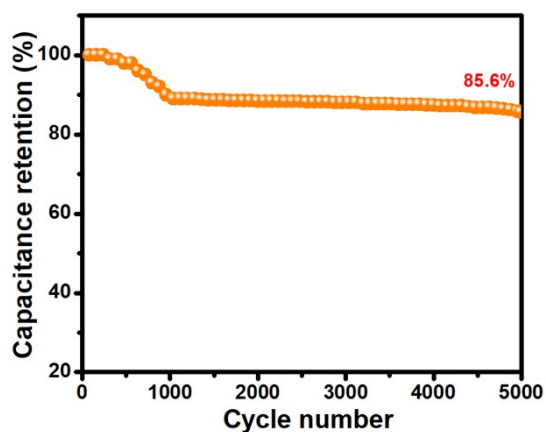

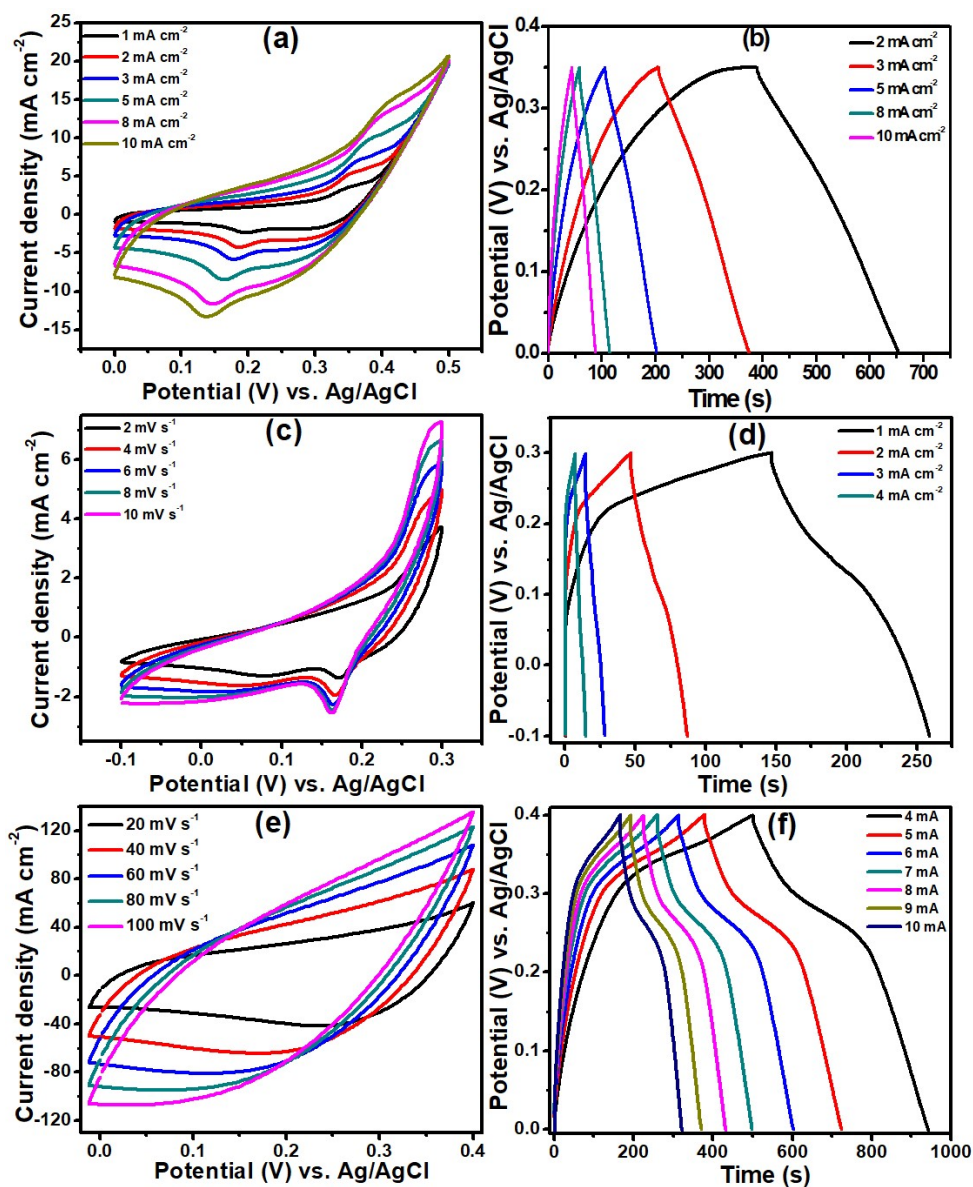

Fig. S6 Representative CV curves (a, c, e) and GCD curves (b, d, f) of ZCO, NiO and NZ-1, respectively.

Table T1. Related energy and power density of ZnCo<sub>2</sub>O<sub>4</sub>@NiO Composite

| Power Density<br>(W kg <sup>-1</sup> ) | Energy Density<br>(Wh kg <sup>-1</sup> ) |
|----------------------------------------|------------------------------------------|
| 800                                    | 46.66                                    |
| 900                                    | 36.50                                    |
| 1000                                   | 27.77                                    |
| 1100                                   | 22.91                                    |
| 1200                                   | 18.66                                    |
| 1400                                   | 13.61                                    |
